# Supplementary material for: Long COVID in the Long Run—23-Month Follow-up Study of Persistent Symptoms
Source: PubMed Central journal article supplement — Open Forum Infect Dis. 2022 Jun 6;9(7):ofac270. doi: 10.1093/ofid/ofac270 (PMC9308378; doi:10.1093/ofid/ofac270), 2022-06-06

**Supplementary Table 1. Prevalence of symptoms regarding recovery, memory and concentration assessed at 23 months follow-up**

|                                            | <b>Acute phase[8]</b> | <b>4 months post COVID[8]<sup>a</sup></b> | <b>23 months post COVID<sup>b</sup></b> |
|--------------------------------------------|-----------------------|-------------------------------------------|-----------------------------------------|
|                                            | n=180                 | n=179                                     | n=170                                   |
| Symptoms, n (%) <sup>c</sup>               | 172 (95.6)            | 95 (53.1)                                 | 65 (38.2)                               |
| Mild symptoms, n (%) <sup>d</sup>          | 145 (80.6)            | 79 (44.1)                                 | 47 (27.6)                               |
| Moderate symptoms, n (%) <sup>d</sup>      | 142 (78.9)            | 42 (23.5)                                 | 28 (16.4)                               |
| Severe symptoms, n (%) <sup>d</sup>        | 145 (80.6)            | 17 (9.5)                                  | 6 (3.5)                                 |
| Number of symptoms, n (%) <sup>c</sup>     |                       |                                           |                                         |
| None                                       | 8 (4.4)               | 84 (46.9)                                 | 105 (61.8)                              |
| 1-2                                        | 13 (7.2)              | 59 (33.0)                                 | 52 (19.4)                               |
| 3-5                                        | 43 (23.9)             | 25 (14.0)                                 | 11 (6.5)                                |
| 6-8                                        | 44 (24.4)             | 9 (5.0)                                   | 1 (0.6)                                 |
| 9-12                                       | 56 (31.1)             | 2 (1.1)                                   | 1 (0.6)                                 |
| 13+                                        | 16 (8.9)              | 0                                         | 0                                       |
| Number of symptoms, mean (SD) <sup>c</sup> | 7.7 (3.6)             | 2.7 (2.3)                                 | 0.7 (1.3)                               |
| Mild symptoms                              | 3.1 (1.9)             | 1.9 (1.3)                                 | 0.4 (0.7)                               |
| Moderate symptoms                          | 2.8 (1.6)             | 2.0 (1.3)                                 | 0.3 (0.7)                               |
| Severe symptoms                            | 3.3 (2.2)             | 1.8 (1.1)                                 | 0.06 (0.4)                              |

<sup>a</sup>Median (range) months to follow-up: 4.2 (1.5-5.1)

<sup>b</sup>Median (range) months to last follow-up: 21.6 (19.3-22.9)

<sup>c</sup>Detailed questionnaire used in all follow-ups. Thus memory and concentration symptoms are not included

<sup>d</sup>Participants were asked to rate severity of any symptom separately, thus numbers in the column add up to more than total no of participants.

**Supplementary Table 2: Symptoms reported during the acute phase, 4 months post COVID and 23 months post COVID**

| Questions                                                 | 23 months post COVID |
|-----------------------------------------------------------|----------------------|
|                                                           | n=170                |
| Do you feel fully recovered, n (%)                        |                      |
| Yes                                                       | 129 (75.9)           |
| Not completely                                            | 37 (21.8)            |
| Not at all                                                | 4 (2.3)              |
| Do you have difficulty remembering <sup>a</sup> , n (%)   |                      |
| No                                                        | 132 (82.5)           |
| Yes, some difficulty                                      | 18 (11.3)            |
| Yes, a lot of difficulty                                  | 6 (3.8)              |
| Do not know                                               | 4 (2.5)              |
| Do you have difficulty concentrating <sup>b</sup> , n (%) |                      |
| No                                                        | 141 (87.6)           |
| Yes, some difficulty                                      | 14 (8.7)             |
| Yes, a lot of difficulty                                  | 3 (1.9)              |
| Do not know                                               | 3 (1.9)              |
| Do you feel different, n (%)                              |                      |
| No                                                        | 141 (82.9)           |
| Yes, somewhat different                                   | 24 (14.1)            |
| Yes, very different                                       | 1 (0.6)              |
| Do not know                                               | 4 (2.4)              |

<sup>a</sup>n=10 reported remembering difficulties before COVID-19 and are excluded, thus n=160

<sup>b</sup>n=9 reported difficulty concentrating before COVID-19 and are excluded, thus n=161

**Supplementary Figure 1. Prevalence of self-reported severity (mild, moderate, and severe) of COVID-19 symptoms at 23-months follow-up**

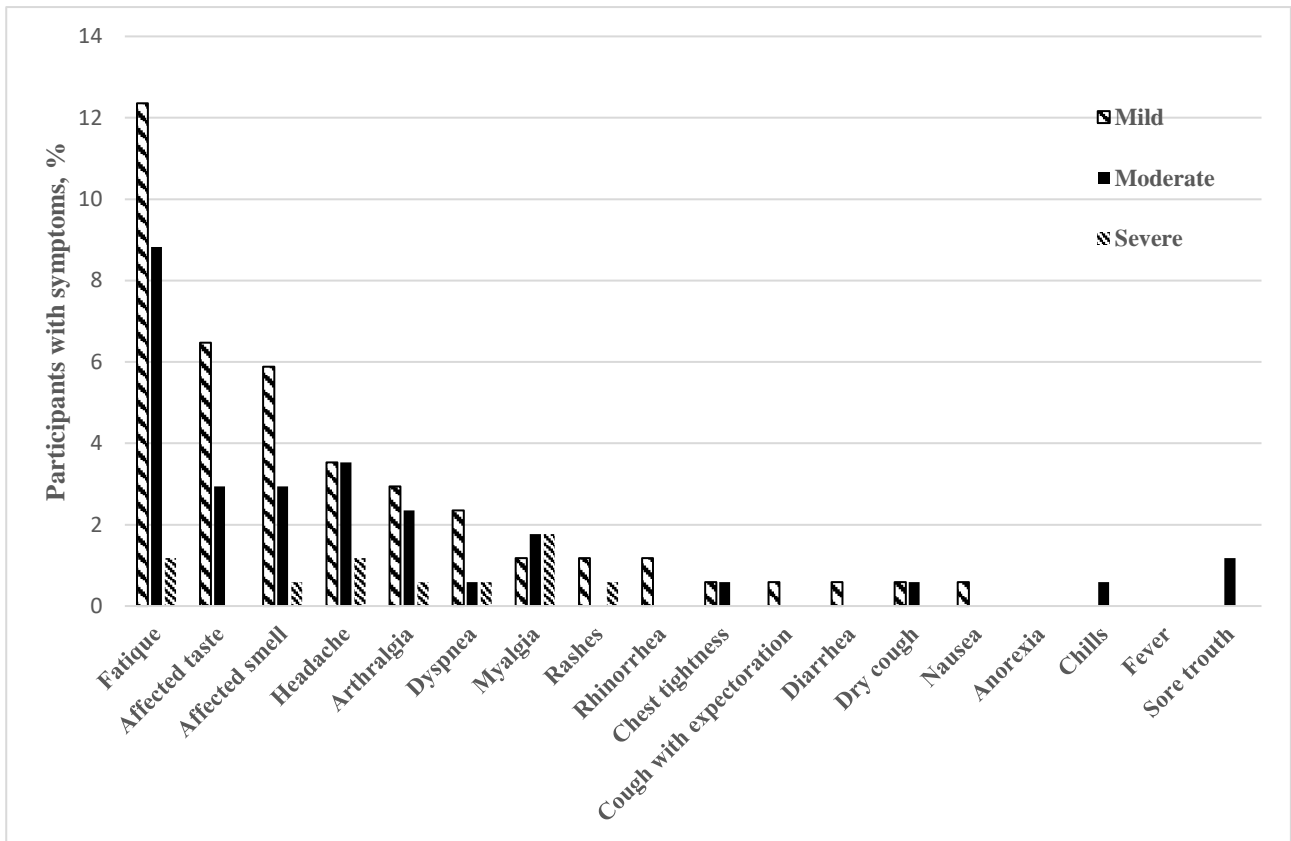

**Supplementary Figure 2. Prevalence (%) of long COVID (n=170) at 23-months follow-up, stratified according to age groups**

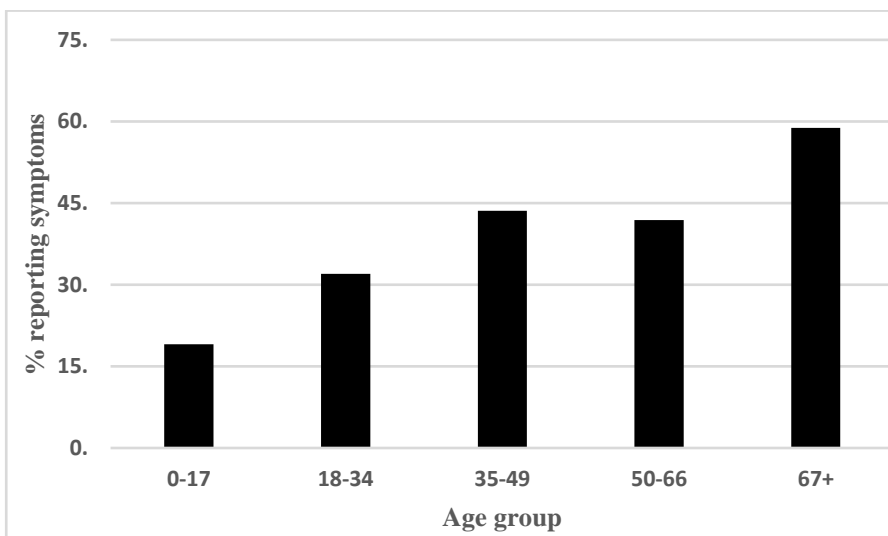

Supplement: ofac270_supplementary_data.pdf [file ofac270_supplementary_data.pdf]
